# Supplementary material for: OEEFs precisely regulating the propane oxidation reaction catalyzed by O–Fe-corrolazine
Source: Royal Society of Chemistry journal article supplement (doi:10.1039/d4nj02167c), 2024-01-01
Supplement: d4nj02167c1.pdf [file d4nj02167c1.pdf]

## Supporting Information

### OEEFs Precisely Regulating the Propane Oxidation Reaction Catalyzed by O-Fe-Corrolazine

Cheng-Cheng Song, Lei Yang, Wei Yang, Xian Bai, Jin-Xia Liang\*, Haiyan Wang\*,  
and Chun Zhu\*

*School of Chemistry and Chemical Engineering, Guizhou University, Guiyang 550025,  
China.*

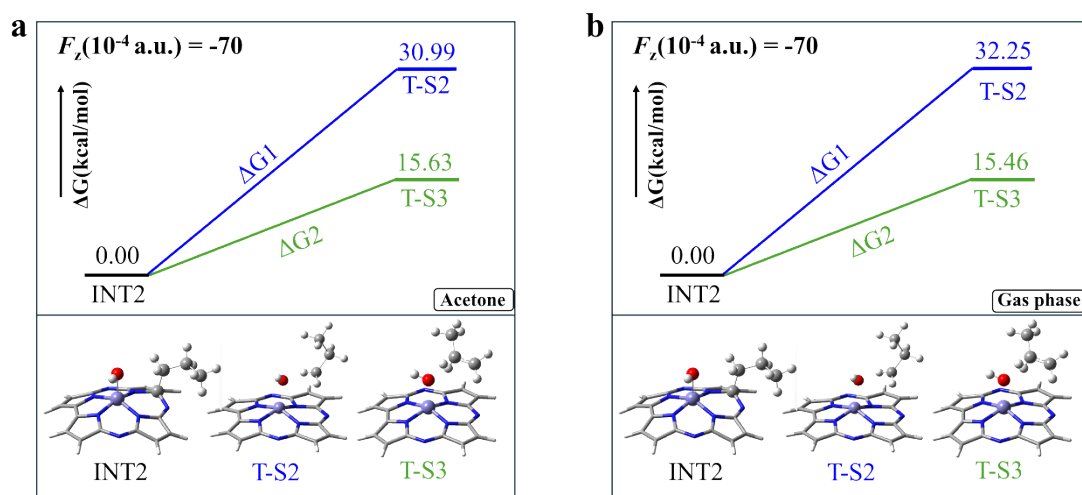

**Fig. S1.** The energy profile of the rate-determining steps for propane selective oxidation catalyzed by O-Fe Corrolazine with  $F_{z1}$  ( $10^{-4}$  a.u.) of -70 in gas phase and acetone solvents, which are the OH transfer step for propanol  $\Delta G1$  and the second dehydrogenation step for propylene  $\Delta G2$ .

**Table S1.** The relative energies (kcal/mol) in gas phase and acetone solvent without OEEFs.

|           | Species |       |       |        |       |      |
|-----------|---------|-------|-------|--------|-------|------|
|           | R-C     | T-S1  | INT1  | INT2   | T-S2  | T-S3 |
| Gas phase | 0.00    | 21.34 | 11.06 | -19.56 | 13.38 | 6.80 |
| Acetone   | 0.00    | 22.50 | 11.98 | -18.14 | 10.17 | 6.06 |

**Table S2.** The calculated energy barriers (kcal/mol) of propane oxidation reaction in gas phase and acetone solvent with the  $F_{z1}$  ( $10^{-4}$  a.u.) of -70.

| $F_{z1}$ ( $10^{-4}$ a.u.) |             | Free energy (kcal/mol) |           |
|----------------------------|-------------|------------------------|-----------|
|                            |             | acetone                | gas phase |
| -70                        | $\Delta G1$ | 30.99                  | 32.55     |
|                            | $\Delta G2$ | 15.63                  | 15.46     |
